# Supplementary material
Source: publisher figshare collection journal article supplement (https://acs.figshare.com/ndownloader/files/4563490)
Supplement: Supplementary file 1 [file 4563490]

data_publication_text
_publ_contact_author_name        'Herbert W. Roesky'
loop_
_publ_author_name
_publ_author_address
'Herbert W. Roesky' ''
'Jana, Anukul' ''
'Schulzke, Carola' ''

 
data_ja44 
 
_audit_creation_method            SHELXL-97 
_chemical_name_systematic 
; 
 ? 
; 
_chemical_name_common             ? 
_chemical_melting_point           ? 
_chemical_formula_moiety          ? 
_chemical_formula_sum 
 'C29 H43 N3 Si' 
_chemical_formula_weight          461.75 
 
loop_ 
 _atom_type_symbol 
 _atom_type_description 
 _atom_type_scat_dispersion_real 
 _atom_type_scat_dispersion_imag 
 _atom_type_scat_source 
 'C'  'C'   0.0033   0.0016 
 'International Tables Vol C Tables 4.2.6.8 and 6.1.1.4' 
 'H'  'H'   0.0000   0.0000 
 'International Tables Vol C Tables 4.2.6.8 and 6.1.1.4' 
 'N'  'N'   0.0061   0.0033 
 'International Tables Vol C Tables 4.2.6.8 and 6.1.1.4' 
 'Si'  'Si'   0.0817   0.0704 
 'International Tables Vol C Tables 4.2.6.8 and 6.1.1.4' 
 
_symmetry_cell_setting            orthorhombic 
_symmetry_space_group_name_H-M    Pbca 
 
loop_ 
 _symmetry_equiv_pos_as_xyz 
 'x, y, z' 
 '-x+1/2, -y, z+1/2' 
 '-x, y+1/2, -z+1/2' 
 'x+1/2, -y+1/2, -z' 
 '-x, -y, -z' 
 'x-1/2, y, -z-1/2' 
 'x, -y-1/2, z-1/2' 
 '-x-1/2, y-1/2, z' 
 
_cell_length_a                    15.529(3) 
_cell_length_b                    17.296(4) 
_cell_length_c                    20.897(4) 
_cell_angle_alpha                 90.00 
_cell_angle_beta                  90.00 
_cell_angle_gamma                 90.00 
_cell_volume                      5613(2) 
_cell_formula_units_Z             8 
_cell_measurement_temperature     133(2) 
_cell_measurement_reflns_used     54219 
_cell_measurement_theta_min       3.1 
_cell_measurement_theta_max       54.0  
 
_exptl_crystal_description        block
_exptl_crystal_colour             colourless  
_exptl_crystal_size_max           0.28 
_exptl_crystal_size_mid           0.19 
_exptl_crystal_size_min           0.14 
_exptl_crystal_density_meas       ? 
_exptl_crystal_density_diffrn     1.093 
_exptl_crystal_density_method     'not measured' 
_exptl_crystal_F_000              2016 
_exptl_absorpt_coefficient_mu     0.104 
_exptl_absorpt_correction_type    numerical 
_exptl_absorpt_correction_T_min   0.8855 
_exptl_absorpt_correction_T_max   0.9482
_exptl_absorpt_process_details    'face indexed' 
 
_exptl_special_details 
; 
 ? 
; 
 
_diffrn_ambient_temperature       133(2) 
_diffrn_radiation_wavelength      0.71073 
_diffrn_radiation_type            MoK\a 
_diffrn_radiation_source          'fine-focus sealed tube' 
_diffrn_radiation_monochromator   graphite 
_diffrn_measurement_device_type   IPDSII 
_diffrn_measurement_method        ? 
_diffrn_detector_area_resol_mean  ? 
_diffrn_standards_number          ? 
_diffrn_standards_interval_count  ? 
_diffrn_standards_interval_time   ? 
_diffrn_standards_decay_%         ? 
_diffrn_reflns_number             51543 
_diffrn_reflns_av_R_equivalents   0.0617 
_diffrn_reflns_av_sigmaI/netI     0.0286 
_diffrn_reflns_limit_h_min        -19 
_diffrn_reflns_limit_h_max        19 
_diffrn_reflns_limit_k_min        -22 
_diffrn_reflns_limit_k_max        22 
_diffrn_reflns_limit_l_min        -26 
_diffrn_reflns_limit_l_max        26 
_diffrn_reflns_theta_min          1.95 
_diffrn_reflns_theta_max          26.98 
_reflns_number_total              6091 
_reflns_number_gt                 5078 
_reflns_threshold_expression      >2sigma(I) 
 
_computing_data_collection        ? 
_computing_cell_refinement        ? 
_computing_data_reduction         ? 
_computing_structure_solution     'SHELXS-97 (Sheldrick, 1990)' 
_computing_structure_refinement   'SHELXL-97 (Sheldrick, 1997)' 
_computing_molecular_graphics     ? 
_computing_publication_material   ? 
 
_refine_special_details 
; 
 Refinement of F^2^ against ALL reflections.  The weighted R-factor wR and 
 goodness of fit S are based on F^2^, conventional R-factors R are based 
 on F, with F set to zero for negative F^2^. The threshold expression of 
 F^2^ > 2sigma(F^2^) is used only for calculating R-factors(gt) etc. and is 
 not relevant to the choice of reflections for refinement.  R-factors based 
 on F^2^ are statistically about twice as large as those based on F, and R- 
 factors based on ALL data will be even larger. 
; 
 
_refine_ls_structure_factor_coef  Fsqd  
_refine_ls_matrix_type            full 
_refine_ls_weighting_scheme       calc  
_refine_ls_weighting_details 
 'calc w=1/[\s^2^(Fo^2^)+(0.0638P)^2^+3.8627P] where P=(Fo^2^+2Fc^2^)/3' 
_atom_sites_solution_primary      direct 
_atom_sites_solution_secondary    difmap 
_atom_sites_solution_hydrogens    geom 
_refine_ls_hydrogen_treatment     mixed 
_refine_ls_extinction_method      none 
_refine_ls_extinction_coef        ? 
_refine_ls_number_reflns          6091 
_refine_ls_number_parameters      323 
_refine_ls_number_restraints      0 
_refine_ls_R_factor_all           0.0782 
_refine_ls_R_factor_gt            0.0625 
_refine_ls_wR_factor_ref          0.1523 
_refine_ls_wR_factor_gt           0.1443 
_refine_ls_goodness_of_fit_ref    1.112 
_refine_ls_restrained_S_all       1.112 
_refine_ls_shift/su_max           0.000 
_refine_ls_shift/su_mean          0.000 
 
loop_ 
 _atom_site_label 
 _atom_site_type_symbol 
 _atom_site_fract_x 
 _atom_site_fract_y 
 _atom_site_fract_z 
 _atom_site_U_iso_or_equiv 
 _atom_site_adp_type 
 _atom_site_occupancy 
 _atom_site_symmetry_multiplicity 
 _atom_site_calc_flag 
 _atom_site_refinement_flags 
 _atom_site_disorder_assembly 
 _atom_site_disorder_group 
Si1 Si 0.53488(4) 0.05574(4) 0.38160(3) 0.03173(17) Uani 1 1 d . . . 
N1 N 0.45896(17) 0.03531(17) 0.43438(11) 0.0556(7) Uani 1 1 d . . . 
N2 N 0.49707(10) 0.08345(9) 0.30752(8) 0.0230(3) Uani 1 1 d . . . 
N3 N 0.60297(11) 0.13053(9) 0.40244(8) 0.0234(3) Uani 1 1 d . . . 
C1 C 0.42447(12) 0.04173(11) 0.28104(9) 0.0233(4) Uani 1 1 d . . . 
C2 C 0.43834(14) -0.02578(12) 0.24543(10) 0.0282(4) Uani 1 1 d . . . 
C3 C 0.36651(15) -0.06467(14) 0.22134(11) 0.0349(5) Uani 1 1 d . . . 
H3 H 0.3745 -0.1107 0.1972 0.046(3) Uiso 1 1 calc R . . 
C4 C 0.28423(15) -0.03743(15) 0.23191(11) 0.0376(5) Uani 1 1 d . . . 
H4 H 0.2362 -0.0646 0.2149 0.046(3) Uiso 1 1 calc R . . 
C5 C 0.27131(14) 0.02938(14) 0.26719(11) 0.0344(5) Uani 1 1 d . . . 
H5 H 0.2144 0.0479 0.2739 0.046(3) Uiso 1 1 calc R . . 
C6 C 0.34091(13) 0.06986(12) 0.29301(10) 0.0264(4) Uani 1 1 d . . . 
C7 C 0.52787(15) -0.05751(13) 0.23328(11) 0.0359(5) Uani 1 1 d . . . 
H7 H 0.5703 -0.0191 0.2501 0.039(3) Uiso 1 1 calc R . . 
C8 C 0.54117(17) -0.13355(14) 0.26997(15) 0.0477(7) Uani 1 1 d . . . 
H8A H 0.5252 -0.1262 0.3149 0.067(2) Uiso 1 1 calc R . . 
H8B H 0.6018 -0.1489 0.2673 0.067(2) Uiso 1 1 calc R . . 
H8C H 0.5050 -0.1740 0.2511 0.067(2) Uiso 1 1 calc R . . 
C9 C 0.5468(2) -0.0695(2) 0.16207(15) 0.0647(9) Uani 1 1 d . . . 
H9A H 0.5080 -0.1092 0.1449 0.067(2) Uiso 1 1 calc R . . 
H9B H 0.6066 -0.0863 0.1567 0.067(2) Uiso 1 1 calc R . . 
H9C H 0.5377 -0.0208 0.1390 0.067(2) Uiso 1 1 calc R . . 
C10 C 0.32556(14) 0.14302(13) 0.33149(12) 0.0351(5) Uani 1 1 d . . . 
H10 H 0.3791 0.1540 0.3565 0.039(3) Uiso 1 1 calc R . . 
C11 C 0.3097(2) 0.21173(16) 0.28727(17) 0.0583(8) Uani 1 1 d . . . 
H11A H 0.3609 0.2208 0.2609 0.067(2) Uiso 1 1 calc R . . 
H11B H 0.2976 0.2579 0.3130 0.067(2) Uiso 1 1 calc R . . 
H11C H 0.2603 0.2007 0.2595 0.067(2) Uiso 1 1 calc R . . 
C12 C 0.2517(2) 0.13516(17) 0.37884(15) 0.0567(8) Uani 1 1 d . . . 
H12A H 0.1974 0.1294 0.3554 0.067(2) Uiso 1 1 calc R . . 
H12B H 0.2490 0.1814 0.4058 0.067(2) Uiso 1 1 calc R . . 
H12C H 0.2611 0.0895 0.4058 0.067(2) Uiso 1 1 calc R . . 
C13 C 0.51054(15) 0.15112(14) 0.20463(11) 0.0350(5) Uani 1 1 d . . . 
H13A H 0.5375 0.1978 0.1871 0.043(7) Uiso 1 1 calc R . . 
H13B H 0.4478 0.1559 0.2019 0.118(16) Uiso 1 1 calc R . . 
H13C H 0.5293 0.1059 0.1800 0.16(2) Uiso 1 1 calc R . . 
C14 C 0.53541(12) 0.14195(11) 0.27008(9) 0.0238(4) Uani 1 1 d . . . 
C15 C 0.59840(13) 0.18966(12) 0.29712(10) 0.0269(4) Uani 1 1 d . . . 
H15 H 0.6208 0.2288 0.2699 0.046(3) Uiso 1 1 calc R . . 
C16 C 0.63288(12) 0.18711(11) 0.35952(10) 0.0244(4) Uani 1 1 d . . . 
C17 C 0.69751(16) 0.23997(13) 0.37834(11) 0.0364(5) Uani 1 1 d . . . 
H17A H 0.7211 0.2374 0.4202 0.054(6) Uiso 1 1 calc R . . 
H17B H 0.7174 0.2780 0.3491 0.054(6) Uiso 1 1 calc R . . 
C18 C 0.63515(13) 0.13103(11) 0.46748(9) 0.0234(4) Uani 1 1 d . . . 
C19 C 0.59184(14) 0.17497(12) 0.51389(10) 0.0284(4) Uani 1 1 d . . . 
C20 C 0.62079(16) 0.17110(13) 0.57720(10) 0.0352(5) Uani 1 1 d . . . 
H20 H 0.5920 0.2001 0.6093 0.046(3) Uiso 1 1 calc R . . 
C21 C 0.69051(17) 0.12582(14) 0.59380(11) 0.0376(5) Uani 1 1 d . . . 
H21 H 0.7087 0.1230 0.6372 0.046(3) Uiso 1 1 calc R . . 
C22 C 0.73390(15) 0.08455(13) 0.54713(11) 0.0342(5) Uani 1 1 d . . . 
H22 H 0.7825 0.0544 0.5588 0.046(3) Uiso 1 1 calc R . . 
C23 C 0.70779(13) 0.08628(12) 0.48325(10) 0.0261(4) Uani 1 1 d . . . 
C24 C 0.51674(15) 0.22744(14) 0.49695(12) 0.0367(5) Uani 1 1 d . . . 
H24 H 0.5018 0.2181 0.4511 0.039(3) Uiso 1 1 calc R . . 
C25 C 0.43635(18) 0.20984(17) 0.53719(17) 0.0555(8) Uani 1 1 d . . . 
H25A H 0.4227 0.1546 0.5342 0.067(2) Uiso 1 1 calc R . . 
H25B H 0.3877 0.2402 0.5211 0.067(2) Uiso 1 1 calc R . . 
H25C H 0.4474 0.2235 0.5820 0.067(2) Uiso 1 1 calc R . . 
C26 C 0.54142(18) 0.31297(14) 0.50389(15) 0.0486(7) Uani 1 1 d . . . 
H26A H 0.5526 0.3246 0.5490 0.067(2) Uiso 1 1 calc R . . 
H26B H 0.4941 0.3454 0.4884 0.067(2) Uiso 1 1 calc R . . 
H26C H 0.5933 0.3235 0.4787 0.067(2) Uiso 1 1 calc R . . 
C27 C 0.75854(13) 0.04111(12) 0.43341(10) 0.0287(4) Uani 1 1 d . . . 
H27 H 0.7296 0.0484 0.3911 0.039(3) Uiso 1 1 calc R . . 
C28 C 0.85064(17) 0.07121(18) 0.42765(16) 0.0548(8) Uani 1 1 d . . . 
H28A H 0.8495 0.1264 0.4171 0.067(2) Uiso 1 1 calc R . . 
H28B H 0.8808 0.0429 0.3938 0.067(2) Uiso 1 1 calc R . . 
H28C H 0.8808 0.0637 0.4684 0.067(2) Uiso 1 1 calc R . . 
C29 C 0.76000(17) -0.04556(13) 0.44812(12) 0.0384(5) Uani 1 1 d . . . 
H29A H 0.7927 -0.0546 0.4875 0.067(2) Uiso 1 1 calc R . . 
H29B H 0.7873 -0.0733 0.4126 0.067(2) Uiso 1 1 calc R . . 
H29C H 0.7009 -0.0643 0.4537 0.067(2) Uiso 1 1 calc R . . 
H1 H 0.555(2) -0.023(2) 0.3996(17) 0.081 Uiso 1 1 d . . . 
H1N H 0.460(2) -0.020(2) 0.4538(18) 0.081 Uiso 1 1 d . . . 
H2N H 0.401(2) 0.078(2) 0.4394(18) 0.081 Uiso 1 1 d . . . 
 
loop_ 
 _atom_site_aniso_label 
 _atom_site_aniso_U_11 
 _atom_site_aniso_U_22 
 _atom_site_aniso_U_33 
 _atom_site_aniso_U_23 
 _atom_site_aniso_U_13 
 _atom_site_aniso_U_12 
Si1 0.0361(3) 0.0303(3) 0.0289(3) 0.0095(2) -0.0131(2) -0.0137(2) 
N1 0.0583(15) 0.0665(16) 0.0418(13) 0.0172(12) -0.0082(11) -0.0249(13) 
N2 0.0224(8) 0.0243(8) 0.0222(8) 0.0020(6) -0.0019(6) -0.0027(6) 
N3 0.0275(8) 0.0218(8) 0.0209(8) 0.0008(6) -0.0029(6) -0.0039(6) 
C1 0.0237(9) 0.0266(10) 0.0195(9) 0.0029(7) -0.0029(7) -0.0033(8) 
C2 0.0317(10) 0.0294(10) 0.0234(10) 0.0004(8) 0.0004(8) -0.0051(8) 
C3 0.0409(12) 0.0361(12) 0.0276(11) -0.0047(9) -0.0007(9) -0.0096(10) 
C4 0.0340(11) 0.0468(14) 0.0320(11) 0.0015(10) -0.0080(9) -0.0152(10) 
C5 0.0243(10) 0.0455(13) 0.0334(11) 0.0061(10) -0.0043(9) -0.0044(9) 
C6 0.0262(10) 0.0301(10) 0.0229(10) 0.0048(8) -0.0036(8) -0.0005(8) 
C7 0.0353(11) 0.0337(11) 0.0386(13) -0.0088(9) 0.0039(10) -0.0005(9) 
C8 0.0427(14) 0.0293(12) 0.0713(19) -0.0076(12) -0.0041(13) 0.0011(10) 
C9 0.0534(17) 0.091(2) 0.0493(17) -0.0157(16) 0.0139(14) 0.0119(16) 
C10 0.0282(10) 0.0366(12) 0.0405(12) -0.0025(10) -0.0036(9) 0.0061(9) 
C11 0.0581(17) 0.0345(14) 0.082(2) 0.0134(14) 0.0209(16) 0.0050(12) 
C12 0.0692(19) 0.0469(16) 0.0542(17) 0.0006(13) 0.0252(15) 0.0122(14) 
C13 0.0346(12) 0.0411(13) 0.0292(11) 0.0110(10) 0.0004(9) -0.0048(10) 
C14 0.0235(9) 0.0245(9) 0.0233(9) 0.0031(7) 0.0009(7) 0.0011(7) 
C15 0.0284(10) 0.0242(10) 0.0281(10) 0.0068(8) 0.0020(8) -0.0015(8) 
C16 0.0251(9) 0.0222(9) 0.0259(10) 0.0013(8) 0.0003(8) -0.0016(7) 
C17 0.0489(13) 0.0292(11) 0.0310(11) 0.0028(9) -0.0009(10) -0.0142(10) 
C18 0.0276(10) 0.0215(9) 0.0213(9) -0.0011(7) -0.0010(8) -0.0062(7) 
C19 0.0320(10) 0.0251(10) 0.0282(10) -0.0026(8) 0.0037(8) -0.0051(8) 
C20 0.0483(13) 0.0314(11) 0.0259(11) -0.0089(9) 0.0057(10) -0.0067(10) 
C21 0.0544(14) 0.0362(12) 0.0222(10) -0.0032(9) -0.0076(10) -0.0079(11) 
C22 0.0405(12) 0.0326(11) 0.0295(11) -0.0013(9) -0.0097(9) -0.0011(9) 
C23 0.0294(10) 0.0246(10) 0.0242(10) -0.0019(8) -0.0018(8) -0.0056(8) 
C24 0.0354(12) 0.0352(12) 0.0395(12) -0.0067(10) 0.0036(10) 0.0053(9) 
C25 0.0385(14) 0.0447(15) 0.083(2) -0.0128(14) 0.0163(14) -0.0027(12) 
C26 0.0498(15) 0.0328(13) 0.0632(17) 0.0026(12) 0.0162(13) 0.0057(11) 
C27 0.0276(10) 0.0288(11) 0.0296(10) -0.0026(8) -0.0003(8) -0.0001(8) 
C28 0.0376(14) 0.0552(17) 0.072(2) -0.0185(15) 0.0130(13) -0.0119(12) 
C29 0.0470(13) 0.0308(12) 0.0375(12) -0.0005(10) 0.0009(10) 0.0071(10) 
 
_geom_special_details 
; 
 All esds (except the esd in the dihedral angle between two l.s. planes) 
 are estimated using the full covariance matrix.  The cell esds are taken 
 into account individually in the estimation of esds in distances, angles 
 and torsion angles; correlations between esds in cell parameters are only 
 used when they are defined by crystal symmetry.  An approximate (isotropic) 
 treatment of cell esds is used for estimating esds involving l.s. planes. 
; 
 
loop_ 
 _geom_bond_atom_site_label_1 
 _geom_bond_atom_site_label_2 
 _geom_bond_distance 
 _geom_bond_site_symmetry_2 
 _geom_bond_publ_flag 
Si1 N1 1.653(3) . ? 
Si1 N2 1.7237(17) . ? 
Si1 N3 1.7266(17) . ? 
N2 C14 1.411(2) . ? 
N2 C1 1.448(2) . ? 
N3 C16 1.406(2) . ? 
N3 C18 1.448(2) . ? 
C1 C2 1.401(3) . ? 
C1 C6 1.408(3) . ? 
C2 C3 1.396(3) . ? 
C2 C7 1.516(3) . ? 
C3 C4 1.380(3) . ? 
C4 C5 1.385(4) . ? 
C5 C6 1.396(3) . ? 
C6 C10 1.518(3) . ? 
C7 C9 1.531(4) . ? 
C7 C8 1.536(4) . ? 
C10 C12 1.521(4) . ? 
C10 C11 1.525(4) . ? 
C13 C14 1.430(3) . ? 
C14 C15 1.399(3) . ? 
C15 C16 1.410(3) . ? 
C16 C17 1.413(3) . ? 
C18 C19 1.404(3) . ? 
C18 C23 1.407(3) . ? 
C19 C20 1.399(3) . ? 
C19 C24 1.519(3) . ? 
C20 C21 1.381(4) . ? 
C21 C22 1.384(3) . ? 
C22 C23 1.395(3) . ? 
C23 C27 1.522(3) . ? 
C24 C26 1.535(3) . ? 
C24 C25 1.536(4) . ? 
C27 C28 1.527(3) . ? 
C27 C29 1.530(3) . ? 
 
loop_ 
 _geom_angle_atom_site_label_1 
 _geom_angle_atom_site_label_2 
 _geom_angle_atom_site_label_3 
 _geom_angle 
 _geom_angle_site_symmetry_1 
 _geom_angle_site_symmetry_3 
 _geom_angle_publ_flag 
N1 Si1 N2 114.57(11) . . ? 
N1 Si1 N3 115.39(11) . . ? 
N2 Si1 N3 103.11(8) . . ? 
C14 N2 C1 118.29(15) . . ? 
C14 N2 Si1 123.62(13) . . ? 
C1 N2 Si1 118.01(13) . . ? 
C16 N3 C18 118.72(16) . . ? 
C16 N3 Si1 124.24(13) . . ? 
C18 N3 Si1 116.90(13) . . ? 
C2 C1 C6 121.59(18) . . ? 
C2 C1 N2 119.89(18) . . ? 
C6 C1 N2 118.51(17) . . ? 
C3 C2 C1 118.0(2) . . ? 
C3 C2 C7 119.85(19) . . ? 
C1 C2 C7 122.11(18) . . ? 
C4 C3 C2 121.2(2) . . ? 
C3 C4 C5 120.3(2) . . ? 
C4 C5 C6 120.8(2) . . ? 
C5 C6 C1 118.1(2) . . ? 
C5 C6 C10 120.07(19) . . ? 
C1 C6 C10 121.78(18) . . ? 
C2 C7 C9 112.8(2) . . ? 
C2 C7 C8 110.5(2) . . ? 
C9 C7 C8 110.1(2) . . ? 
C6 C10 C12 112.9(2) . . ? 
C6 C10 C11 110.7(2) . . ? 
C12 C10 C11 110.0(2) . . ? 
C15 C14 N2 119.61(17) . . ? 
C15 C14 C13 120.64(19) . . ? 
N2 C14 C13 119.74(18) . . ? 
C14 C15 C16 128.35(18) . . ? 
N3 C16 C15 119.09(17) . . ? 
N3 C16 C17 120.47(18) . . ? 
C15 C16 C17 120.44(19) . . ? 
C19 C18 C23 121.34(18) . . ? 
C19 C18 N3 119.10(18) . . ? 
C23 C18 N3 119.55(17) . . ? 
C20 C19 C18 118.3(2) . . ? 
C20 C19 C24 119.7(2) . . ? 
C18 C19 C24 122.01(19) . . ? 
C21 C20 C19 121.1(2) . . ? 
C20 C21 C22 119.8(2) . . ? 
C21 C22 C23 121.4(2) . . ? 
C22 C23 C18 117.96(19) . . ? 
C22 C23 C27 119.54(19) . . ? 
C18 C23 C27 122.50(18) . . ? 
C19 C24 C26 111.2(2) . . ? 
C19 C24 C25 112.2(2) . . ? 
C26 C24 C25 110.0(2) . . ? 
C23 C27 C28 111.34(19) . . ? 
C23 C27 C29 111.91(18) . . ? 
C28 C27 C29 109.6(2) . . ? 
 
_diffrn_measured_fraction_theta_max    0.998 
_diffrn_reflns_theta_full              26.98 
_diffrn_measured_fraction_theta_full   0.998 
_refine_diff_density_max    1.007 
_refine_diff_density_min   -0.452 
_refine_diff_density_rms    0.048 
